# Supplementary material for: Second-Chance Signal Transduction Explains Cooperative Flagellar Switching
Source: PubMed Central journal article supplement (PMC3402542; doi:10.1371/journal.pone.0041098), 2012-07-23
Supplement: pone.0041098.s001.pdf [file pone.0041098.s001.pdf]

# 1 **Supplementary Methods**

## 2 Simulation Program

3 We assembled a program using the visual software package Simulink (Mathworks, Natick, MA  
4 USA). Aside from offering a library of useful subroutines and functions, Simulink simplifies the  
5 task of programming and coordinating multiple processes operating at independent rates.

6

7 The program is based on a constant rate of interactions between switch complexes that bind  
8 ligand and a single motor unit (Fig. 1S). The constant rate of signals received by a motor is  
9 simulated by a pulse generator. The amplitude of a pulse is a variable that corresponds to the  
10 probability a ligand is bound ( $\theta$ ). The width of the pulse determines the time a switch complex  
11 dwells at the dwell site of a motor. The period of the pulse is the fraction of the width in which  
12 the amplitude is not zero, but the output is held constant. A single value between 0 and 1 from  
13 the pulse generator is processed, by a sequence of subroutines (Fig. 1S), to a bit that is recorded  
14 for visual display and stored in a vector array for further analysis. As a conceptual aid, we  
15 divided one sequential program into three subroutines with logical relationships to our model.

16

17 The Switch subroutine simulates stochastic transitions between two conformations of a single  
18 switch complex. Based on a probability received from the pulse generator, the Switch subroutine  
19 simulates a stochastic binding event and outputs the result as bit 0 for conformation u or bit 1 for  
20 conformation U (Fig. 2S). The bit is held for the duration of the pulse.

21

22 The Reader subroutine simulates the decay of the excited state of a motor unit (Fig. 3S). The  
23 time constant ( $\tau$ ) is an experimental variable. Initially the integrator of the subroutine is set to 1,  
24 representing the probability that a motor unit is excited. The probability declines with a single  
25 exponential rate,  $\tau^{-1}$ . If the value 1 is received from the Switch subroutine, the integrator is reset  
26 to probability 1. The output is held at a discrete value for the duration of the pulse.

27

28 The main function of the Output subroutine is to simulate a stochastic event based on the  
29 probability of the excited state (Fig. 4S). It is helpful to note that the input probability can be 1  
30 only if ligand binding simulated by the Signal subroutine is bit 1 (see above). If probability 1 is  
31 received, the output of the Output subroutine will always be bit 1, which conforms to the

32 constraint that coupling is 100% effective. Otherwise, the output bit is simulated based on the  
33 input probability, except for the following prevailing condition.

34

35 If during the previous dwell time the output was bit 0 (ground state), the present output cannot be  
36 bit 1. According to the model, formation of the excited state of a motor unit requires energy  
37 coupling with a ligand-bound switch complex, and the lifetime of the excited state probability is  
38 intrinsic to the motor unit until the moment a ground state event occurs. Thereafter, the  
39 probability of an excited state event should be zero until a fresh excitation event takes place.  
40 However, if uncorrected, the simulation program allows an excited state event to take place  
41 without being stimulated (Fig. 5S). We addressed this problem by including a block that stores  
42 the previous bit (Fig. 4S); if bit 0 is the previous state of the motor unit and input probability is  
43 less than 1, then the current output is set to bit 0. Functional values of the Output subroutine are  
44 summarized in Table 1S.

45

46 Our solution to correct the output record is effective (Fig. 6S), but with a cautionary note. Rather  
47 than terminating the excited state, the program allows the excited state to decay after a ground  
48 state event. Spurious excited state events are filtered before output. Hence, the output of the  
49 simulation is faithful to the model, but not the internal state of the program.

50

51 To achieve an all-or-none output, the individual output bits of all ensemble motors are compared  
52 in a logic circuit to the bit value of the most recent ensemble output (Panel A; Fig 7S). The  
53 motor subroutines are as described above. All receive a simultaneous pulse, which carries the a  
54 given amplitude (probability of ligand binding). The most recent output is stored as bit 1 (CW)  
55 or bit 0 (CCW). For an arbitrary pulse, the program first compares the bits from the individual  
56 motor units using the logic AND function for identity. If the comparison meets the AND  
57 criteria, the program assigns a bit corresponding to the bit of the motor units and compares the  
58 assigned bit to the bit stored from the most recent output. If the second comparison does not  
59 meet the AND criteria, the output is switched from the stored bit value to the opposite bit value.  
60 A record from any one of the ensemble motor units shows many more reversals than the output  
61 of the ensemble (Panel B; Figure 7S).

62

63 Simulation Standards

64 The  $\theta$  was determined for arbitrary  $[L]$  from the standard hyperbola with  $K_L$  equal to  $3.7 \mu\text{M}$ . In  
65 a Simulink program, the dwell time for a switch complex was held constant (1 unit/event), and  $\theta$   
66 was the amplitude of 10,000 pulses, where each pulse simulated a switch complex-motor  
67 interaction. CW Bias was the fraction of bit 1 events out of the total.

68

69 Preliminary Results

70 We determined conditions in which the output of the simulation approaches the CW bias  
71 predicted by  $\alpha = 1$  and  $\alpha = 2$ . Given pulses of constant dwell time (1 unit/pulse), the simulation  
72 was conducted for variable  $\tau^{-1}$  in a range 0.8-10 units<sup>-1</sup>. For  $\tau^{-1} > 4$  the simulated CW bias  
73 converged on the value predicted by the M function for  $\alpha = 1$  (Fig. 7S). Smaller decay rates  
74 were seen to increase CW bias (Fig. 7S), which is consistent with our model. We estimated that  
75 the CW bias simulated with  $\tau^{-1} = 0.8$  was sufficiently close to the CW bias predicted by the M  
76 function for  $\alpha = 2$  (Fig. 7S).

77

78

79

80 **Supplement Table**

81

82 **Table 1S. Truth table for the Output subroutine**

| Input<br>Probability | Previous<br>Output | Present<br>Output |
|----------------------|--------------------|-------------------|
| 1                    | 0 or 1             | 1                 |
| <1                   | 1                  | 0 or 1            |
| <1                   | 0                  | 0                 |

83

84

85

## 86 Supplement Figure Legends

87

88 **Figure 1S. Components of the simulation of a single motor.** Three subroutines are connected  
89 in sequence, namely, Switch (2), Reader (3), and Output (4), corresponding to functional  
90 elements of the model we propose. The pulse generator (1) was set to 1 for the pulse width  
91 (dwell time), 95% for the pulse period (dwell time interval), and arbitrary amplitude between 0  
92 and 1. The outputs of each of the components are connected to a scope (5), which displays the  
93 results in program time.

94

95 **Figure 2S. Diagram showing components of the Switch subroutine.** This subroutine receives  
96 a value between 0 and 1 from the pulse generator (Prob 1). A pseudo-random variable between 0  
97 and 1 is generated with a built-in function ( $\{S2\}$ ). If the value of the random number is less than  
98 or equal to the probability a ligand is bound (Prob 1), the output is 1; however, if the value is  
99 greater than Prob 1, the output is 0. The ground ( $\{S1\}$ ) caps an unused port of ( $\{S2\}$ ). Data type  
100 conversion between Boolean and double precision is required by the program to maintain data  
101 storage compatibility with the next subroutine ( $\{S4\}$ ).

102

103 **Figure 3S. Diagram of the Reader subroutine.** The circuit composed of the integrator ( $\{R1\}$ )  
104 and a constant ( $\{R2\}$ ) generates an exponential decay from an initial value of 1. A built-in solver  
105 uses  $\{R2\}$  and the output of the previous time step to compute the integral for output from  $\{R2\}$   
106 at the current time step. The initial state of  $\{R1\}$  is set to 1; the initial state is restored if the input  
107 (Reset) rises from bits 0 to 1 at the beginning of a new pulse.  $\{R2\}$  has the value of the inverse  
108 time constant ( $\tau$ ). The value of  $\{R1\}$  at the onset of a pulse is held constant for the duration of  
109 the dwell time ( $\{R3\}$ ) while the integrator continues. Zero Order Hold block,  $\{R3\}$ , outputs a  
110 discrete value between 0 and 1 to a port for the next subroutine (Prob 1).

111

112 **Figure 4S. Diagram showing components of the Output subroutine.** Data type conversion  
113 between Boolean and double precision is required by the program to maintain data storage  
114 compatibility with the previous subroutine ( {O1} ). Given input of 1, Switch Block ( {O2} )  
115 passes 1 to output (Event 1). The value of the previous Event 1 is stored in Hold Block ( {O3} ).  
116 Regardless of the value of Prob 1, if {O3} has a value of bit 0, Switch Block ( {O4} ) outputs 0,  
117 which then passes to Event 1. For Prob 1 < 1 and {O3} equal bit 1, the value of Prob 1 passes  
118 from Switch Block ( {O4} ) to be evaluated at logic block {O5}, If Prob 1 is greater than or equal  
119 to a pseudo-random number generated by Function Block ( {O6} ), Event 1 receives bit 1.  
120 Otherwise, Event 1 receives bit 0.

121

122 **Figure 5S. Output of uncorrected simulation.** The four records are simultaneous outputs of  
123 the components shown in diagrammatic form (Fig. 1S), namely, Pulse Generator and Switch,  
124 Reader, and Output subroutines. The probability of the excited state of the Reader subroutine  
125 rises to 1 when a value of 1 is received from the Switch subroutine. Although declining  
126 exponentially, discrete values of the excited state probability are seen as greater than zero  
127 (\*, Motor) for dwell times after the stimulation (\*, Switch). The lifetime of the excited state  
128 probability gives rise to bit 1 events from the Output routine during intervals with no stimulation  
129 from the Switch routine (record between dotted lines). Resurrection of an excited state event  
130 after a ground state event without stimulation (arrows, Output) contradicts a premise of our  
131 model, namely, an excited state requires coupling by a ligand bound switch complex. The  
132 program is shown in Fig. 4S corrects for this error.

133

134 **Figure 6S. Output of simulation using a circuit that corrects for spurious output.** With  
135 additional logic code, the Output subroutine (Fig. 4S) filters out spurious resurrections (Fig. 5S),  
136 but does not terminate the simulated lifetime of the associated excited state probability.  
137 Although effective and expedient, this filtering solution does not fully conform to the workings  
138 of the model as described in the supplementary text.

139

140 **Figure 7S.** Diagram and sample output of the simulation program. A. The Simulink program  
141 with five motor units ( $n = 5$ ) shows the logic circuit that reverses the binary output of the  
142 previous sample time only when the vector of the motor routine outputs is exclusively 0 or 1. B.  
143 A sample record of dwell time pulses was collected from one motor unit and the ensemble of  
144 five motor units.

145

146 **Figure 8S. Comparison of predicted and simulated CW bias in response to arbitrary decay**  
147 **rate.** The purpose is to identify a minimum simulated CW bias of a single motor unit given  
148 constant dwell time interval and ligand binding probability. Increasing the decay rate ( $\tau^{-1}$ )  
149 reduces the opportunity for a ligand binding event to stimulate the motor to the excited state,  
150 which is required for CW output. The CW bias, calculated for one motor ( $n = 1$ ) using the M  
151 function (see below), is shown for three values of  $\alpha$ . Conditions: The dwell time interval and  
152 ligand binding probability are set in the simulation to unity and 0.5 respectively. Each point  
153 represents the average output of 10,000 pulses (Fig. 1S). For simplicity, the coupling and ligand  
154 binding constants,  $K_0$  and  $K_L$ , are set to unity. Given these conditions the M function for one  
155 motor unit simplifies to  $M = (1 - M)(1 + (\alpha - 1)M)$ .

156
